# Supplementary material for: NIR light-triggered shrinkable thermoresponsive PNVCL nanoshells for cancer theranostics
Source: Royal Society of Chemistry journal article supplement (doi:10.1039/c7ra07485a), 2017-01-01
Supplement: c7ra07485a1.pdf [file c7ra07485a1.pdf]

# NIR Light Triggered Shrinkable Thermoresponsive PNVCL Nanoshells for Cancer Theranostics

Deepak S. Chauhan<sup>a§</sup>, S. Indulekha<sup>a§</sup>, Rupesh Gottipalli<sup>a</sup>, B. Pradeep K. Reddy<sup>a</sup>, Tanmayee R.

Chikate<sup>a</sup>, Ramkrishn Gupta<sup>a</sup>, Dushyant N. Jahagirdar<sup>a</sup>, Rajendra Prasad<sup>b</sup>, Abhijit De<sup>c\*</sup> and Rohit

Srivastava<sup>a\*</sup>

<sup>a</sup> Department of Biosciences and Bioengineering, Indian Institute of Technology Bombay, Powai, Mumbai, India. Email: [rsrivasta@iitb.ac.in](mailto:rsrivasta@iitb.ac.in)

<sup>b</sup> Academy of Scientific and Innovative Research (AcSIR), National Chemical Laboratory, Pune-411008, India

<sup>c</sup> Molecular Functional Imaging Lab, Advanced Centre for Treatment, Research and Education in Cancer (ACTREC), Tata Memorial Centre, Kharghar, Navi Mumbai, India.  
Email: [ade@actrec.gov.in](mailto:ade@actrec.gov.in)

<sup>§</sup> These authors have equal contribution

### Calculation to determine photothermal efficiency:

According to Roper et. al [26], total energy balance of the system is expressed by the following equation (1)

$$\sum_i m_i C_{p,i} \frac{dT}{dt} = Q_{NS} + Q_{Dis} - Q_{Surr} \quad (1)$$

Where,  $m$  = mass of water,  $C_p$  = heat capacity of water,  $T$  = solution temperature,  $Q_{NS}$  = energy input by the Au PNVCL NS,  $Q_{Dis}$  = baseline energy input by the sample cell and  $Q_{Surr}$  = heat conduction from the system surface by air.

$Q_{NS}$  is the laser induced source term and represents the heat dissipated from the surface during irradiation of Au PNVCL NS by 750nm laser.

$$Q_{NS} = I(1 - 10^{-A_{750}})\eta \quad (2)$$

Where,  $I$  is incident laser power,  $\eta$  is the conversion efficiency, and  $A_{750}$  is the absorbance of Au PNVCL NS at 750 nm.

$Q_{Surr}$  is the outgoing thermal energy and is represented by following equation

$$Q_{Surr} = hS(T - T_{Surr}) \quad (3)$$

where  $h$  is heat transfer coefficient,  $S$  is the surface area of the well,  $T$  is the solution temperature, and  $T_{Surr}$  is temperature of the surrounding.

Since, heat output  $Q_{Surr}$  is increased along with the increase in temperature according to the equation (3), system temperature will rise to a maximum when the heat input is equal to heat output as shown in following equation (4):

$$Q_{NS} + Q_{Dis} = Q_{Surr - Max} = hS(T_{Max} - T_{Surr}) \quad (4)$$

Where  $Q_{Surr-Max}$  is heat conduction away from the system when the sample cell reaches the equilibrium temperature, and  $T_{Max}$  is the equilibrium temperature. Photothermal transduction efficiency  $\eta$  can be calculated by substituting equation (2) for  $Q_{NS}$  into equation (4) and obtaining equation (5)

$$\eta = \frac{hS(T_{Max} - T_{Surr}) - Q_{Dis}}{I(1 - 10^{-A_{750}})} \quad (5)$$

Where  $Q_{Dis}$  was measured independently using water to be 8.1 mW for 750 nm laser,  $T_{Max} - T_{Surr}$  was found to be 20.6 °C for Au PNVCNS,  $I$  was 650 mW,  $A_{750}$  was determined to be 0.2544 at 750 nm. Thus, only the  $hS$  remains unknown for calculating  $\eta$ . To determine  $hS$ , a dimensionless driving force temperature,  $\theta$  is introduced using the maximum system temperature  $T_{Max}$ .

$$\theta = \frac{T - T_{Surr}}{T_{Max} - T_{Surr}} \quad (6)$$

And a sample system time constant  $\tau_s$

$$\tau_s = \frac{\sum_i m_i C_{p,i}}{hS} \quad (7)$$

which is substituted into equation (1) and rearranged to yield

$$\frac{d\theta}{dt} = \frac{1}{\tau_s} \left[ \frac{Q_{NS} + Q_{Dis}}{hS(T_{Max} - T_{Surr})} - \theta \right] \quad (8)$$

When the laser source is turned off,  $Q_{NS} + Q_{Dis} = 0$ , thereby reducing the equation (8) to

$$\frac{d\theta}{dt} = -\frac{\theta}{\tau_s} \quad (9)$$

and after integration, giving the expression

$$t = -\tau_s \ln \theta \quad (10)$$

Hence, time constant ( $\tau_s$ ) was determined by plotting the time versus the negative logarithm of temperature in cooling period. Thus, with the help of equation (10) and (7),  $hS$  deduced to be 3.81 mW after taking  $m = 0.1$  g and  $C = 4.2$  J/g. Substituting these values in equation (5), the photothermal transduction efficiency ( $\eta$ ) of Au PNVCN NS turned out to be 24.42 %.

## Supporting Figures:

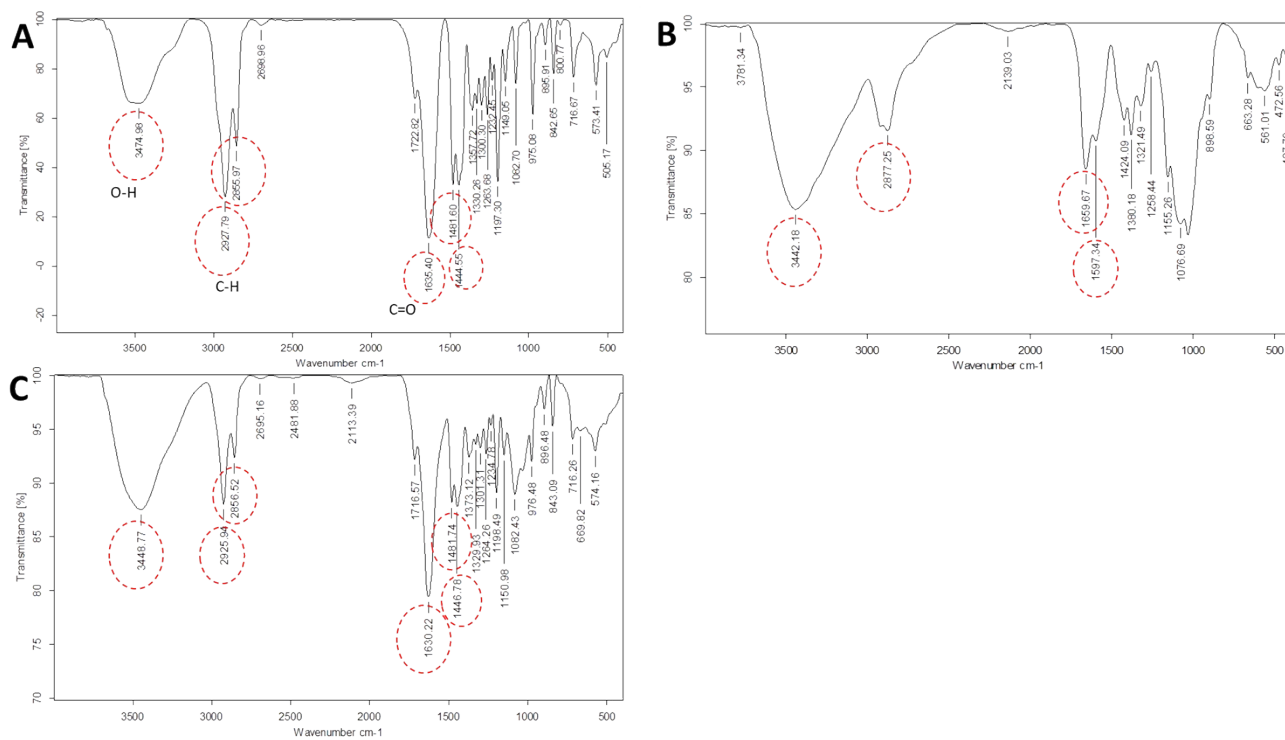

**Fig. S1.** FTIR spectrum of **(A)** PNVCL-COOH, **(B)** CHT, and **(C)** CHT-g-PNVCL. Red circles indicate relevant peaks

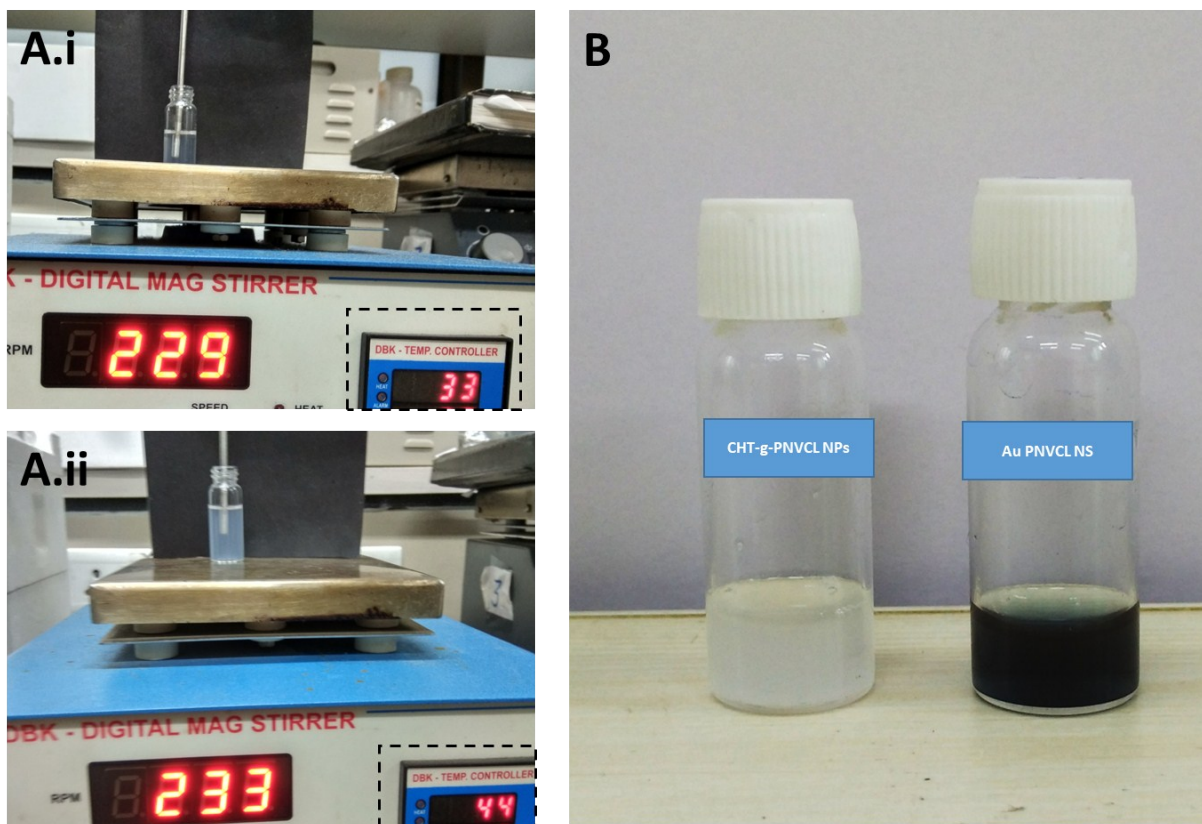

**Fig. S2.** Phase separation with increase in temperature and color change of CHT-g-PNVCL NPs after gold coating. **(A.i, ii)** CHT-g-PNVCL at physiological temperature i.e. 30-40 °C (i), and phase separated CHT-g-PNVCL at hyperthermic temperature i.e. 43-44 °C (ii); dashed rectangle shows the set temperature. **(B)** Change in color due to gold shell formation over the surface of CHT-g-PNVCL NPs.

A.i

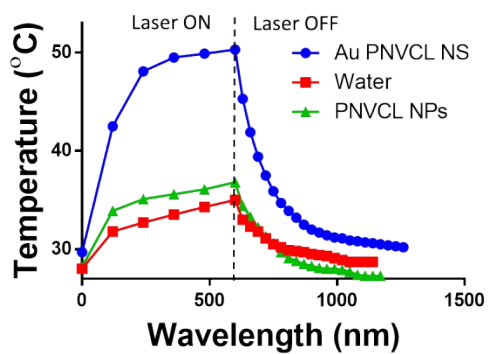

A.ii

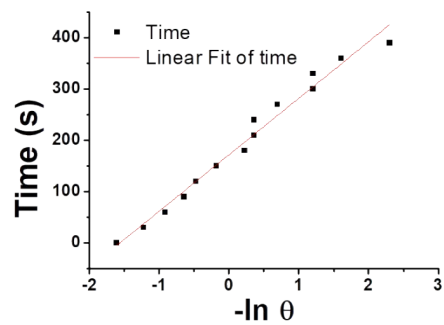

**Fig.S3.** Photothermal characterization of Au PNVCN NS. **(A.i, ii)** Temperature change corresponding to laser ON and OFF (i), and time versus negative logarithm of driving force temperature ( $\vartheta$ ) from the cooling stage of Au PNVCN NS (ii).

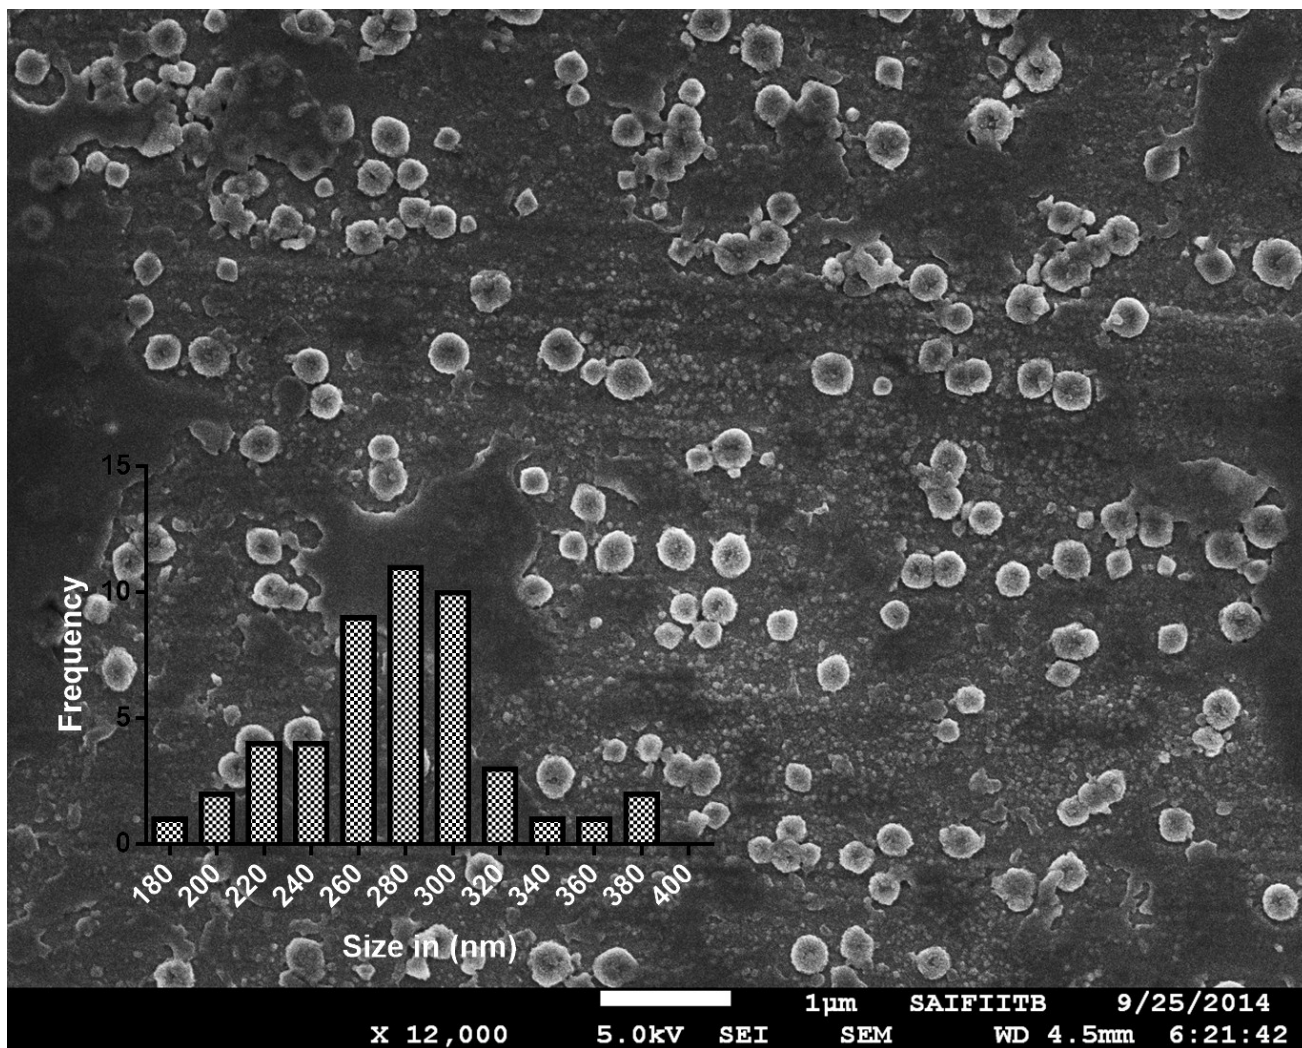

**Fig. S4.** FEG-SEM image of CHT-g-PNVCL NPs and size distribution.



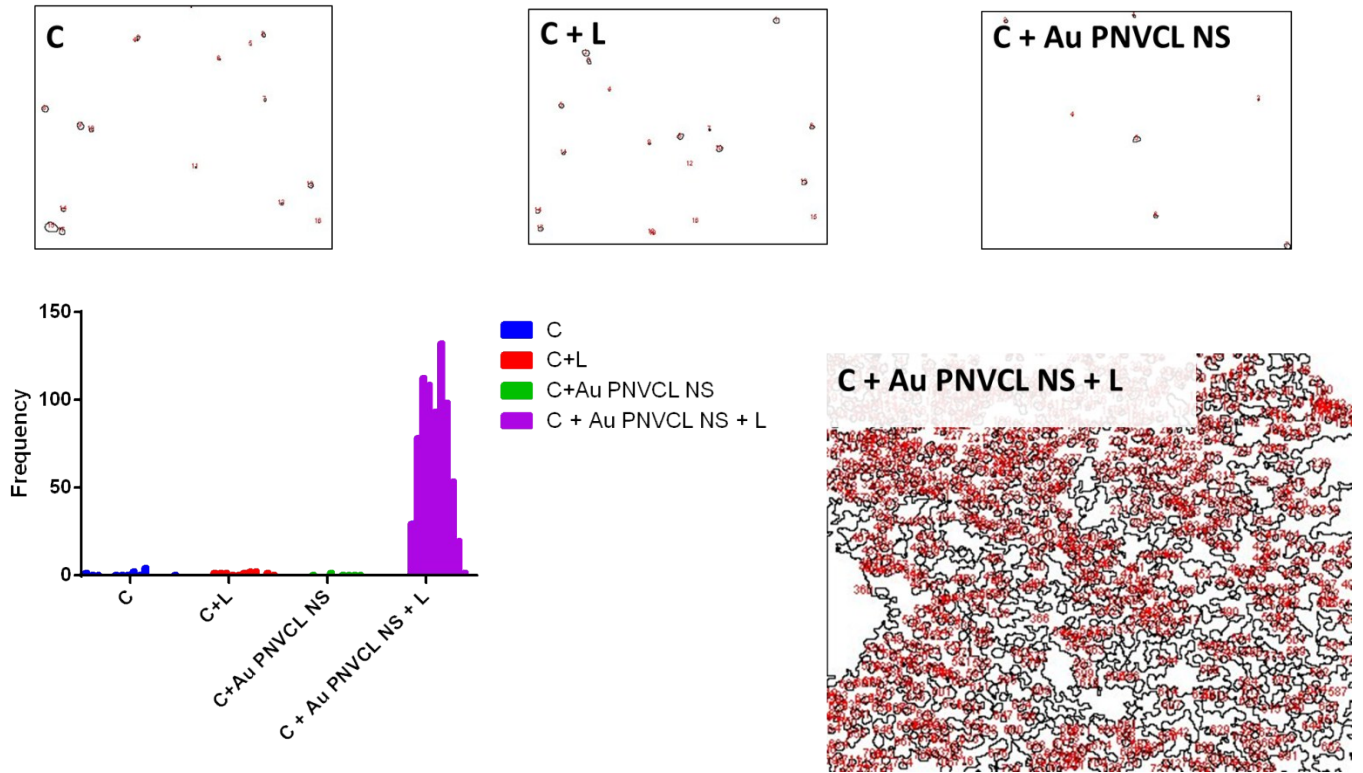

**Fig. S5.** Intensity drawing and percentage frequency of dead cells. Abbreviation C: Cells only, C+L: Cells + Laser, C+ Au PNVCL NS: Cells incubated with Au PNVCL NS, and C + Au PNVCL NS + L: 4 min laser irradiation over cells incubated with Au PNVCL NS.

A.i

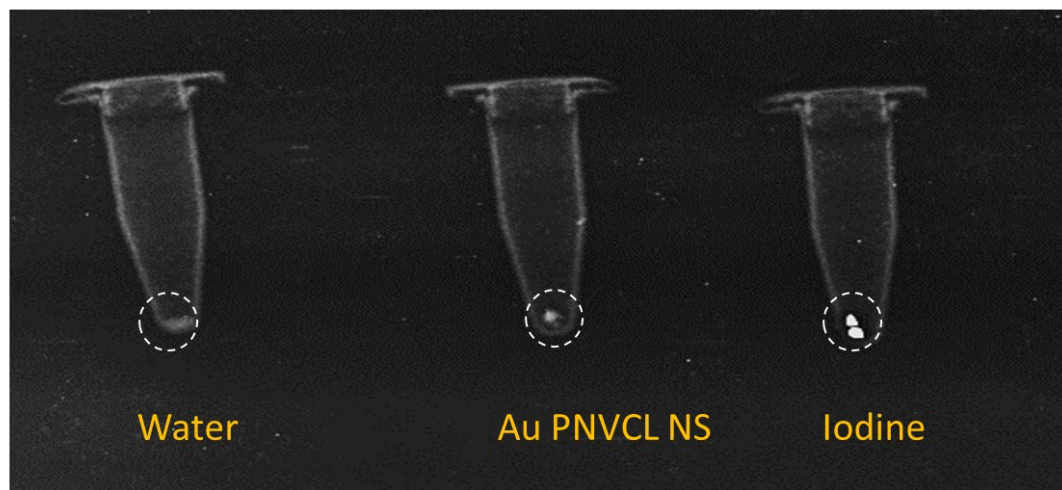

A.ii

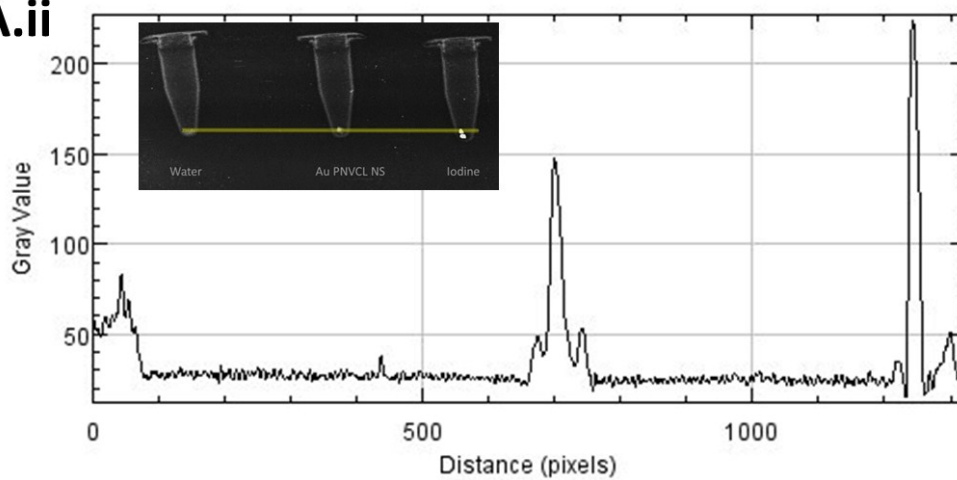

**Fig. S6.** Pilot X-ray imaging. **(A.i, ii)** X-ray imaging of water (left), Au PNVCN NS (centre), iodine (right) (i), and intensity plot profile showing exact gray values (ii).
